# Supplementary figures and images for: A PEDF-Derived Peptide Inhibits Retinal Neovascularization and Blocks Mobilization of Bone Marrow-Derived Endothelial Progenitor Cells
Source: Hindawi journal article supplement (doi:10.1155/2012/518426), 2011-06-28

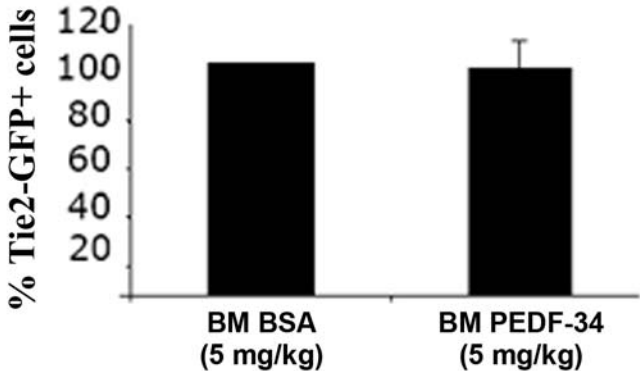

Supplement: f1 [file 518426.f1.pdf]

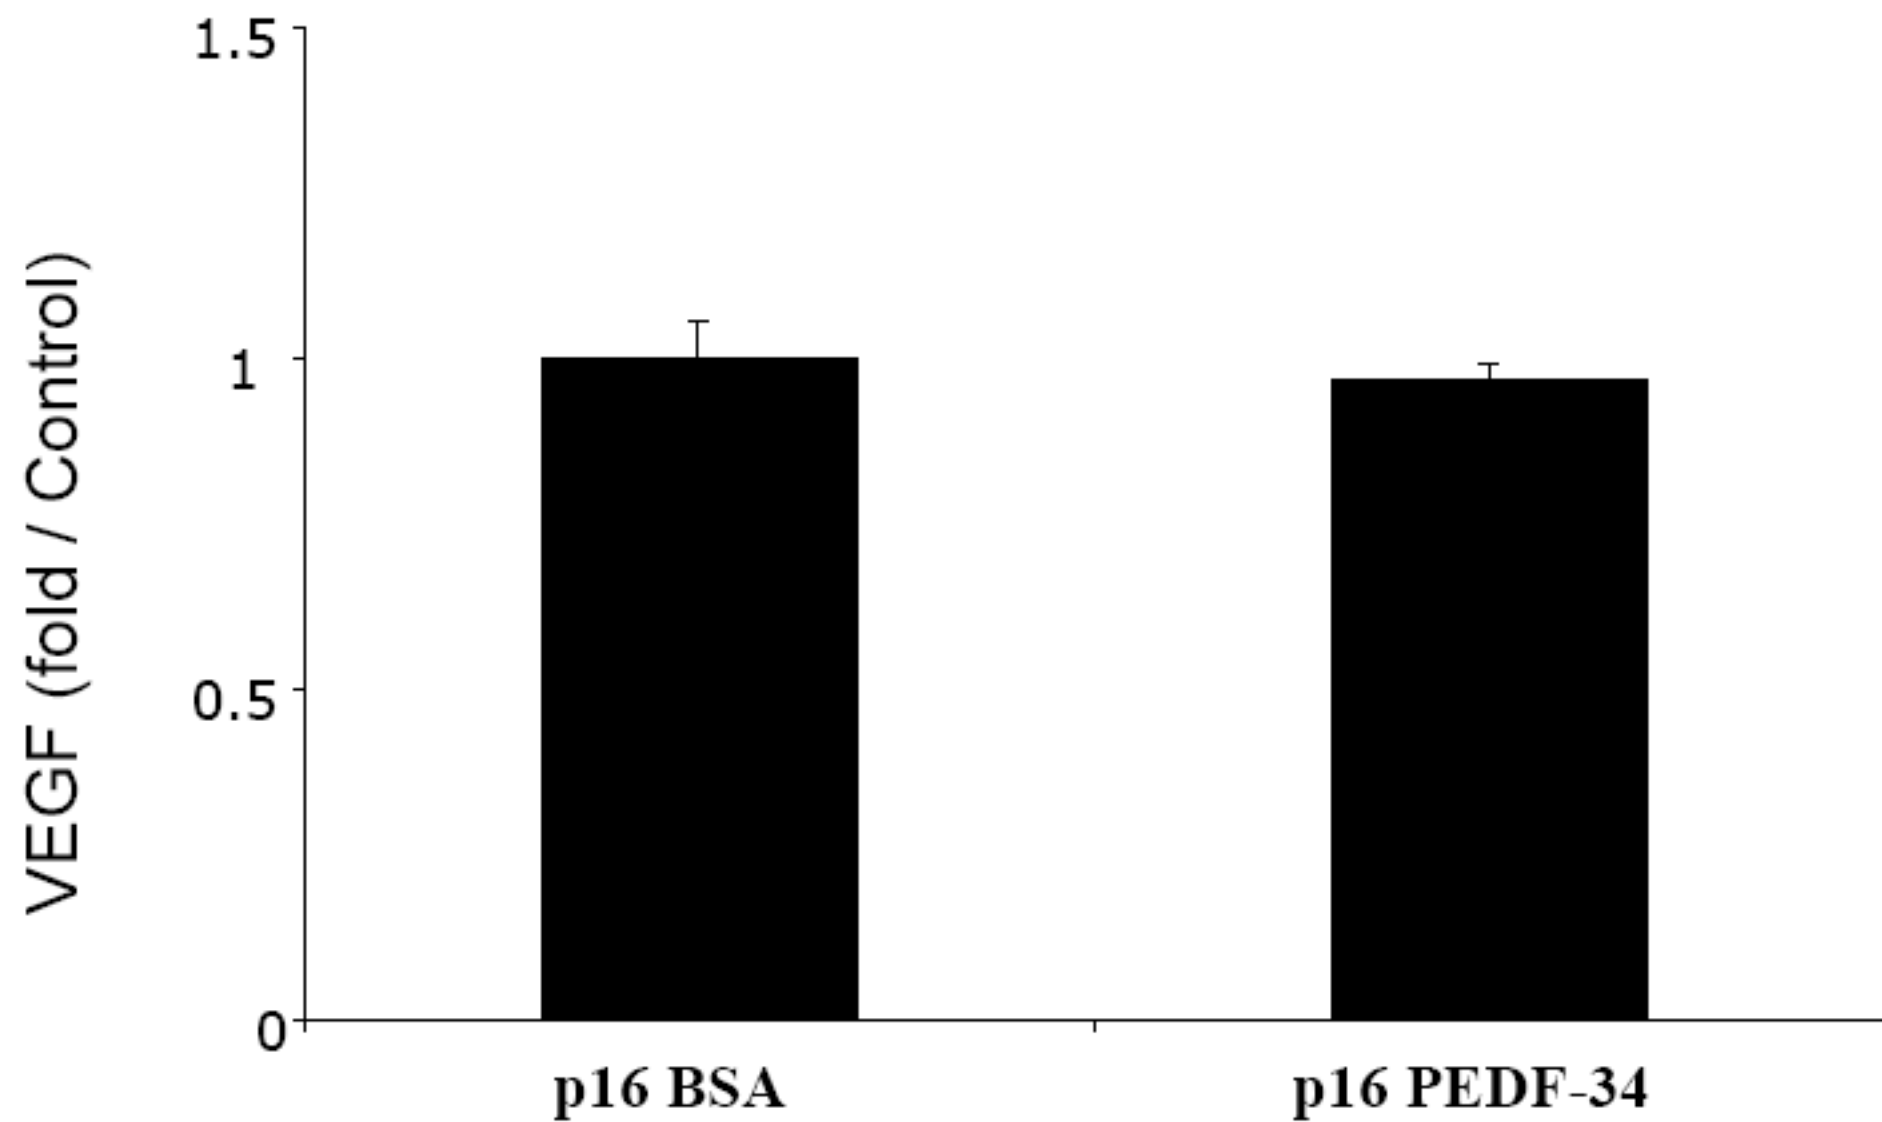

Supplement: f2 [file 518426.f2.pdf]
